# Supplementary material for: Chemically bonding BaTiO3 nanoparticles in highly filled polymer nanocomposites for greatly enhanced dielectric properties
Source: Royal Society of Chemistry journal article supplement (doi:10.1039/d0tc01296c), 2020-01-01
Supplement: d0tc01296c1.pdf [file d0tc01296c1.pdf]

## Supporting Information

### Chemically bonding BaTiO<sub>3</sub> nanoparticles in highly filled polymer nanocomposites for greatly enhanced dielectric properties

Rui-Chao Chen <sup>a</sup>, Quan-Ping Zhang <sup>a\*</sup>, Kai Ke <sup>b</sup>, Nan Sun <sup>c</sup>, Wei-Di Xu <sup>a</sup>, Dong-Liang Liu <sup>a</sup>, Yin-Tao Li <sup>a</sup>, Wenbin Yang <sup>a</sup>, Yuan-Lin Zhou <sup>a</sup>, Ming-Bo Yang <sup>b</sup>, Jinkai Yuan <sup>d\*</sup>, Wei Yang <sup>b\*</sup>

<sup>a</sup> State Key Laboratory of Environment-friendly Energy Materials, Southwest University of Science and Technology, Mianyang 621010, China

<sup>b</sup> College of Polymer Science and Engineering, State Key Laboratory of Polymer Materials Engineering, Sichuan University, Chengdu 610065, China

<sup>c</sup> Institute of Materials, China Academy of Engineering Physics, Jianguyou 621908, China

<sup>d</sup> Centre de Recherche Paul Pascal, CNRS, University of Bordeaux, UMR5031, 33600 Pessac, France

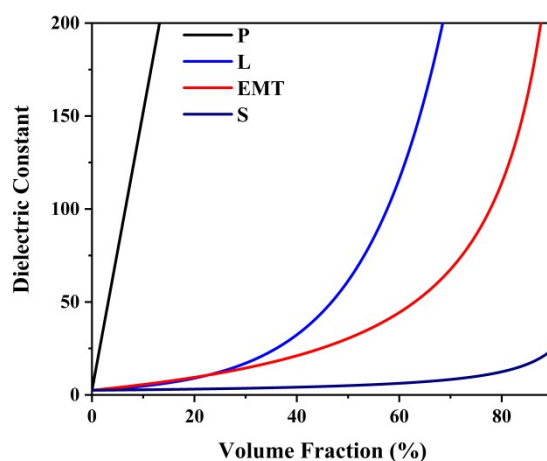

**Figure S1** Theoretical calculation curves of Parallel model, Logarithmic model, EMT model and Series model comparing with experimental value.

**Table S1** Theoretical models for predicting the dielectric constants of polymer composites

| Models            | Equation                                                                                                                                                     |
|-------------------|--------------------------------------------------------------------------------------------------------------------------------------------------------------|
| Parallel model    | $\varepsilon = vol_F \% \varepsilon_F + vol_M \% \varepsilon_M$                                                                                              |
| Logarithmic model | $\varepsilon = e^{vol_F \% \ln \varepsilon_F + vol_M \% \ln \varepsilon_M}$                                                                                  |
| EMT model         | $\varepsilon = \varepsilon_M \left[ 1 + \frac{vol_F \% (\varepsilon_F - \varepsilon_M)}{\varepsilon_M + n vol_M \% (\varepsilon_F - \varepsilon_M)} \right]$ |
| Series model      | $\varepsilon = \frac{\varepsilon_F \varepsilon_M}{vol_F \% \varepsilon_M + vol_M \% \varepsilon_F}$                                                          |

Corresponding authors: Quan-Ping Zhang; Jinkai Yuan; Wei Yang  
E-mails: zhangqp@swust.edu.cn; jinkai.yuan@crpp.cnrs.fr; weiyang@scu.edu.cn

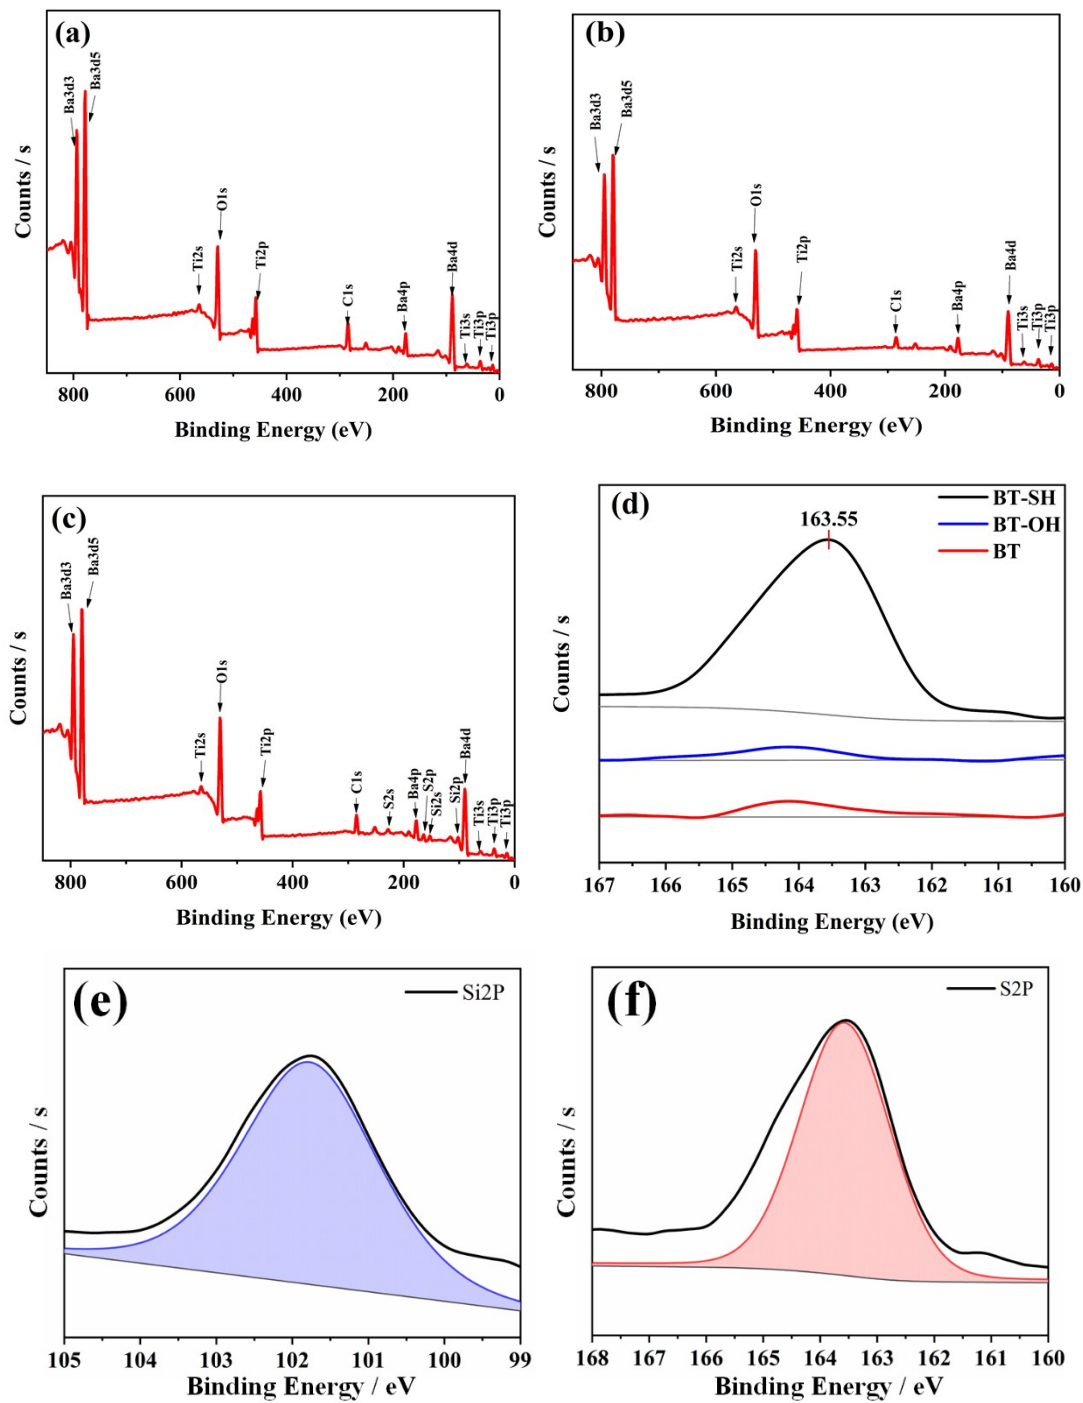

**Figure S2** Wide-scan XPS spectra of (a) BT, (b) BT-OH, (c) BT-SH and (d) S2P spectra of BT, BT-OH and BT-SH, (e) Si2p and (f) S2p core-level spectra of the BT-SH surfaces.

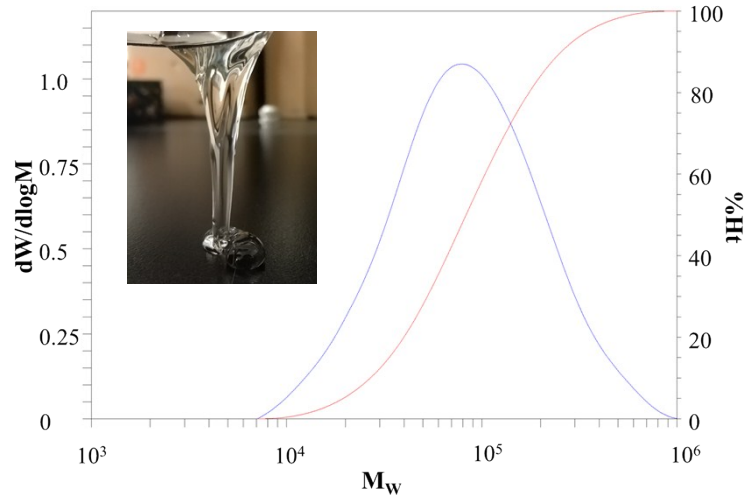

**Figure S3 GPC curves of polymethylvinylsiloxane.**

**Table S2 Molecular parameters of polymethylvinylsiloxane from GPC curves.**

|              | <b>Mp</b> | <b>Mn</b> | <b>Mw</b> | <b>Mz</b> | <b>Mz+1</b> | <b>Mv</b> |
|--------------|-----------|-----------|-----------|-----------|-------------|-----------|
| <b>PMVSO</b> | 79255     | 57278     | 118361    | 224636    | 355202      | 106495    |

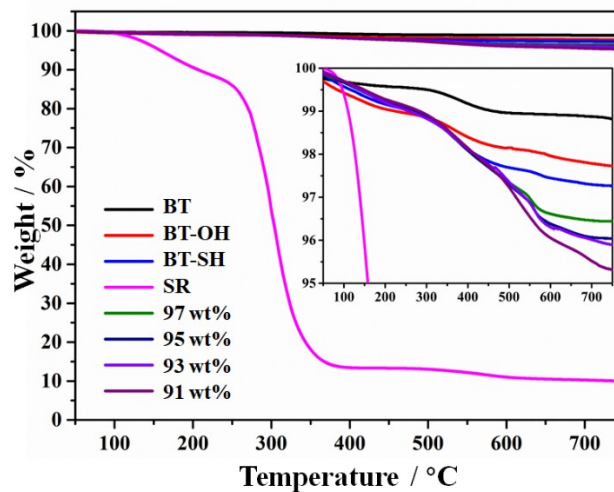

**Figure S4 Thermal gravimetric analysis curves of the BT nanoparticles with different surface modifications, neat SR, and the nanocomposites at high BT nanoparticles loading.**

Figure S4 depicts the weight changes of BT nanoparticles, neat SR and the nanocomposites with increasing the temperature. The decreasing trend of weight-loss ratios (BT > BT-OH > BT-SH > 97 wt% > 91 wt% > 88 wt% nanocomposites) at 700 °C also suggest the successful modification of BT nanoparticles and fabrication of highly-filled polymer nanocomposites.

The volume fraction of BTs ( $vol_1\%$ ) and SR shell ( $vol_2\%$ ) can be calculated with **Formula S1 and S2**, and mass fraction of BTs ( $wt_1\%$ ) can be calculated with **Formula 3**. Conversion relationship between mass fraction and volume fraction is depicted in **Figure S4 (a)**.

$$vol_1\% = \frac{\frac{4}{3}\pi R^3}{\frac{4}{3}\pi(R+d)^3} \times vol_2\% \quad \text{S1}$$

$$vol_3\% = vol_2\% - vol_1\% \quad \text{S2}$$

$$wt_1\% = \frac{m_1}{m_1 + m_2 + m_5} = \frac{m_1}{m_1 + m_2} = \frac{\rho_1 vol_1\%}{\rho_1 vol_1\% + \rho_2 vol_2\%} \quad \text{S3}$$

**Table S3 key parameters for the calculation of volume fraction of voids**

| Parameter                         | Set Value             | Annotation                                        |
|-----------------------------------|-----------------------|---------------------------------------------------|
| <b>1</b>                          | -                     | BT nanoparticles.                                 |
| <b>2</b>                          | -                     | SR.                                               |
| <b>3</b>                          | -                     | SR shell.                                         |
| <b>4</b>                          | -                     | SR which fills the void.                          |
| <b>5</b>                          | -                     | Voids.                                            |
| <b>C</b>                          | -                     | Critical value with $vol_5\%=0$ .                 |
| <b>max</b>                        | -                     | Critical value with $vol_5\%=25.95\%$ .           |
| <b>R</b>                          | 50nm                  | The average radius of BT nanoparticles.           |
| <b>d</b>                          | 2nm                   | The minimum average thickness of the shell layer. |
| <b><math>\rho_0</math></b>        | $\sim 0$              | The density of air.                               |
| <b><math>\rho_{BT}</math></b>     | 6.08g/cm <sup>3</sup> | The density of BT nanoparticles.                  |
| <b><math>\rho_{SR}</math></b>     | 1.2g/cm <sup>3</sup>  | The density of SR.                                |
| <b>Vol<sub>0</sub>%</b>           | 74.05%                | The space utilization of FCC structure.           |
| <b>n</b>                          | 0.9                   | the morphology factor of EMT                      |
| <b><math>\epsilon_{BT}</math></b> | 1500                  | The dielectric constant of BT nanoparticles.      |
| <b><math>\epsilon_{SR}</math></b> | 2.51                  | The dielectric constant of SR                     |

One of the closest 3D-packing models of spheres with the equivalent radius is the face-centered cubic (FCC) model, as depicted in **Figure 2 (I)**, which has a space utilization of 74.05% and a maximum void volume fraction of 25.95%. The critical volume fraction and mass fraction of BTs can be calculated as:

$$vol_{1C}\% = \frac{\frac{4}{3}\pi R^3}{\frac{4}{3}\pi(R+d)^3} \times vol_0\% = 65.83\%$$

$$wt_{1C}\% = \frac{\rho_1 vol_{1C}\%}{\rho_1 vol_{1C}\% + \rho_2 vol_{2C}\%} = 90.71\%$$

In this study, the nanocomposites are composed of BTs, SR matrix and voids. Their relationship can be described as **Formula S4 and S5**. The volume fraction of voids at a certain BT mass fraction can be calculated with the **Formula S6**. At the maximum void volume fraction, maximum mass fraction of BTs ( $wt_{1max}\%$ ) in certain shell thickness can be confirmed. The next section insights a brief discussion on voids and dielectric constant behavior of the extremely high-filled polymer composites.

$$1 = vol_1\% + vol_2\% + vol_5\% \quad S4$$

$$1 = wt_1\% + wt_2\% + wt_5\% = wt_1\% + wt_2\% \quad S5$$

$$\rho_2 vol_2\% = \frac{\rho_1 vol_1\%}{wt_1\%} - \rho_1 vol_1\% = \rho_1 vol_1\% \frac{1 - wt_1\%}{wt_1\%}$$

$$vol_2\% = \frac{\rho_1}{\rho_2} vol_1\% \frac{1 - wt_1\%}{wt_1\%}$$

$$vol_5\% = 1 - vol_2\% - vol_1\% = 1 - vol_1\% \left[ 1 + \frac{\rho_1(1 - wt_1\%)}{\rho_2 wt_1\%} \right] \quad S6$$

Most of dielectric constant prediction models of polymer composites, like as EMT, are based on continuous structure. EMT model can give a precise prediction of dielectric constant for the polymer composites filled with 0 dimensional fillers, which is indicated in **Figure S5 (b) and (c)**. When filler mass fraction is above critical value, void volume fraction cannot be neglected and continuous structures of matrix are damaged.

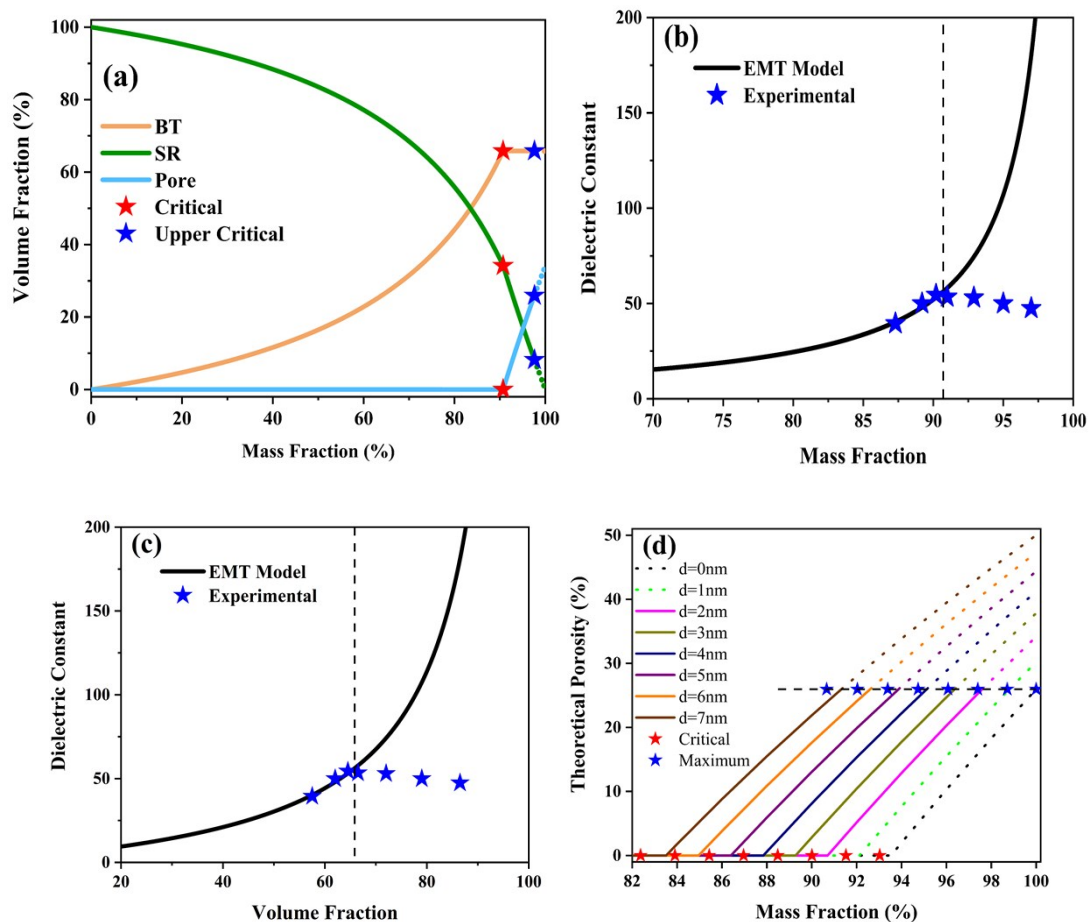

Figure S5 (a) relation between mass and volume fraction of the components (based on BT mass fraction and 2 nm thick shell); (b) EMT model prediction and experiment results (based on mass fraction); (c) EMT model prediction and experiment results (based on volume fraction); (d) critical values of different organic layer thickness.

Table S4 Critical values of the component variation with thickness of organic layer

| $d/nm$ | $vol_{1c}^{\%}$ | $vol_{2c}^{\%}$ | $vol_{3c}^{\%}$ | $wt_{1c}^{\%}$ | $wt_{1max}^{\%}$ |
|--------|-----------------|-----------------|-----------------|----------------|------------------|
| 0*     | 74.05*          | 25.95*          | 0*              | 93.53*         | 100*             |
| 1*     | 69.78*          | 30.22*          | 4.27*           | 92.13*         | 98.81*           |
| 2      | 65.83           | 34.17           | 8.22            | 90.71          | 97.59            |
| 3      | 62.17           | 37.83           | 11.88           | 89.28          | 96.37            |
| 4      | 58.78           | 41.22           | 15.27           | 87.84          | 95.12            |
| 5      | 55.63           | 44.37           | 18.42           | 86.40          | 93.87            |
| 6      | 52.71           | 47.29           | 21.34           | 84.96          | 92.60            |
| 7      | 49.98           | 50.02           | 24.07           | 83.51          | 91.32            |

**Table S5 Representative dielectric properties of polymer nanocomposites with 0 dimensional BT nanoparticles.**

| Matrix           | Filler loading | $\epsilon_{\text{eff}}/\epsilon_m$ | $\tan\delta$ | $E_b/E_m$ | References |
|------------------|----------------|------------------------------------|--------------|-----------|------------|
| PMMA             | 35 wt%         | 1.54                               | 0.028        | /         | [S1]       |
| Polyimide        | 50 wt%         | 2.69                               | 0.016        | 0.912     | [S2]       |
| P(VDF-TrFE-CTFE) | 59 wt%         | 3.25                               | 0.009        | 0.613     | [S3]       |
| PVDF             | 77 wt%         | 5.52                               | 0.035        | /         | [S4]       |
| P(VDF-HFP)       | 82 wt%         | 2.62                               | 0.025        | 0.625     | [S5]       |
| PMMA             | 83 wt%         | 10.23                              | 0.032        | /         | [S6]       |
| SR               | 90 wt %        | 21.85                              | 0.019        | 0.797     | This work  |

**Note:**

PMMA, Poly(methyl methacrylate)

PVDF, Poly(vinylidene fluoride)

P(VDF-HFP), Poly(vinylidene fluoride-cohexafluoropropylene)

P(VDF-TrFE-CTFE), Poly(vinylidene fluoride-trifluoroethylene-chlorotrifluoroethylene)

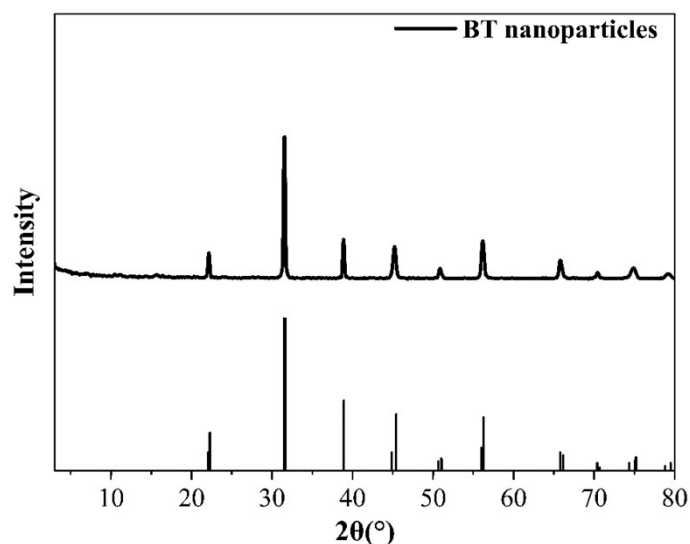

**Figure S6 X-Ray Diffraction spectrum of BTs**

**References**

[S1] K. Suematsu, M. Arimura, N. Uchiyama and S. Saita, Transparent BaTiO<sub>3</sub>/PMMA nanocomposite films for display technologies: Facile surface modification approach for BaTiO<sub>3</sub> nanoparticles, ACS Appl. Nano Mater. 1 (2018) 2430-2437.

[S2] J. Ru, D. Min, M. Lanagan, S. Li and G. Chen, Energy storage properties of polyimide/BaTiO<sub>3</sub> nanocomposite films and their breakdown mechanism in a wide content range, Appl. Phys. Lett. 115 (2019) 213901.

- [S3] S. Chen, X. Lv, X. Han, H. Luo, C.R. Bowen and D. Zhang, Significantly improved energy density of BaTiO<sub>3</sub> nanocomposites by accurate interfacial tailoring using a novel rigid-fluoro-polymer, *Polym. Chem.* 9 (2018) 548-557.
- [S4] K. Yu, H. Wang, Y. Zhou, Y. Bai and Y. Niu, Enhanced dielectric properties of BaTiO<sub>3</sub>/poly(vinylidene fluoride) nanocomposites for energy storage applications, *J. Appl. Phys.* 113 (2013) 034105.
- [S5] P. Kim, N. M. Doss, J. P. Tillotson, P. J. Hotchkiss, M.-J. Pan, S. R. Marder, J. Li, J. P. Calame and J. W. Perry, High energy density nanocomposites based on surface-modified BaTiO<sub>3</sub> and a ferroelectric polymer, *ACS Nano* 3 (2009) 2581-2592.
- [S6] K. Yang, X. Huang, M. Zhu, L. Xie, T. Tanaka and P. Jiang, Combining RAFT polymerization and thiol-ene click reaction for core-shell structured polymer@BaTiO<sub>3</sub> nanodielectrics with high dielectric constant, low dielectric loss and high energy storage capability. *ACS Appl. Mater. Interfaces* 6 (2014) 1812-1822.
